# Supplementary material
Source: PubMed Central journal article supplement (PMC4921238)
Supplement: NIHMS794645-supplement-Supporting_Information.pdf [file NIHMS794645-supplement-Supporting_Information.pdf]

## Table of Contents

|                                                                                                                   |           |
|-------------------------------------------------------------------------------------------------------------------|-----------|
| <b>Supplementary Methods .....</b>                                                                                | <b>2</b>  |
| <b>1. One-Step pFBA.....</b>                                                                                      | <b>2</b>  |
| <b>2. Finding Alternate MapMaker and PathTracer Solutions Using Integer Cuts .....</b>                            | <b>2</b>  |
| 2.1 MapMaker Integer Cuts:.....                                                                                   | 2         |
| 2.2 PathTracer Integer Cuts:.....                                                                                 | 2         |
| <b>3. Bilevel Program to Eliminate All Paths Between Two Metabolites.....</b>                                     | <b>3</b>  |
| <b>4. PathTracer with Net Overall Transformations.....</b>                                                        | <b>5</b>  |
| <b>Supplementary Figures .....</b>                                                                                | <b>7</b>  |
| <b>Figure S1. Top 15 Shortest Paths from Putrescine to Glutamate. ....</b>                                        | <b>7</b>  |
| <b>Figure S2. Carbon Cycles and Paths Involved in the Net Transformation of CO<sub>2</sub> to Glutamate. ....</b> | <b>8</b>  |
| <b>Supplementary Tables.....</b>                                                                                  | <b>9</b>  |
| <b>Table S1. iJO1366 Carbon Transfer Map Category and MapMaker Performance Statistics.....</b>                    | <b>9</b>  |
| <b>Table S2. iJO1366 Reactions with Incorrectly Predicted Carbon Transfer Maps .....</b>                          | <b>10</b> |
| <b>Table S3. NADH and Ubiquinone Recycling .....</b>                                                              | <b>11</b> |
| <b>Table S4. ATP Generation and Pyruvate to Phosphoenolpyruvate .....</b>                                         | <b>11</b> |
| <b>Table S5. Glutamate Generation and Putrescine Degradation .....</b>                                            | <b>11</b> |
| <b>Table S6. CO<sub>2</sub> and Phosphoenolpyruvate to Oxaloacetate.....</b>                                      | <b>12</b> |
| <b>Table S7. Propanoyl-CoA to Pyruvate .....</b>                                                                  | <b>12</b> |
| <b>Table S8. Glyoxylate to Glycine.....</b>                                                                       | <b>12</b> |
| <b>Table S9. CO<sub>2</sub> and Glycine to Propanoyl-CoA.....</b>                                                 | <b>13</b> |
| <b>Table S10. Oxaloacetate and Phosphoenolpyruvate to <math>\alpha</math>-Ketoglutarate and Glycine ...</b>       | <b>13</b> |
| <b>Table S11. Oxaloacetate to Glycine and Glyoxylate.....</b>                                                     | <b>14</b> |
| <b>Table S12. Overall Reactions for Each Sub-Path and Net Overall Transformation Reaction.....</b>                | <b>14</b> |

## Supplementary Methods

### 1. One-Step pFBA

Parsimonious FBA (pFBA) finds a flux distribution ( $v$ ) which maximizes an objective function (e.g., biomass or metabolite production) and also minimizes the total flux through the network. pFBA can be formulated as two optimization problems (e.g., maximize biomass and then minimize the sum of the absolute values of fluxes). In this work, a single optimization problem was formulated to maximize production of a metabolite and minimize the sum of the absolute values of fluxes:

|                                                                                                    |      |
|----------------------------------------------------------------------------------------------------|------|
| $\max \sum_{i \in Mol} v_i^{sink} - \sum_{j \in J} \epsilon \cdot (v_j^{forward} + v_j^{reverse})$ | (S1) |
| $\sum_{j \in J} S_{ij} \cdot v_j - v_i^{sink} = 0, \quad \forall i \in Mol$                        | (S2) |
| $\sum_{j \in J} S_{ij} \cdot v_j = 0, \quad \forall i \notin Mol$                                  | (S3) |
| $v_j = v_j^{forward} - v_j^{reverse}, \quad \forall j \in J$                                       | (S4) |
| $v_j^{Lower} \leq v_j \leq v_j^{Upper} \quad \forall j \in J$                                      | (S5) |

Here  $v_i^{sink}$  is a non-negative flux variable that removes a metabolite of interest ( $Mol$ ) from the network,  $v_j^{forward}$  and  $v_j^{reverse}$  are non-negative flux variables used to represent the net flux ( $v_j$ ) through a reaction  $j$ , (**Eq. S4**).  $J$  is the set of all reactions. The upper and lower limits for each flux are  $v_j^{Lower}$  and  $v_j^{Upper}$ , respectively.  $\epsilon$  is a parameter used to penalize total flux usage and, unless stated otherwise, was set to  $10^{-3}$ . Alternatively, to optimize for production of biomass **Eq. S3-S5**, would be imposed as constraints and **Eq. S6** used as an objective function. Since  $v_{Biomass}$  is much smaller than the total fluxes a smaller value for  $\epsilon$  was used ( $\epsilon = 1e-8$ ) in **Eq. S6**.

|                                                                                    |      |
|------------------------------------------------------------------------------------|------|
| $\max v_{Biomass} - \sum_{j \in J} \epsilon \cdot (v_j^{forward} + v_j^{reverse})$ | (S6) |
|------------------------------------------------------------------------------------|------|

### 2. Finding Alternate MapMaker and PathTracer Solutions Using Integer Cuts

#### 2.1 MapMaker Integer Cuts:

To generate alternate MapMaker solutions that have different CTMs (i.e., different  $\gamma_{Crp}$ ), integer constraints (**Eq. S7**) can be added using solutions for  $\gamma_{Crp}$  (which indicates whether C is transferred from  $r$  to  $p$ ) from each previous solution,  $k$ :

|                                                                                                                                               |      |
|-----------------------------------------------------------------------------------------------------------------------------------------------|------|
| $\sum_{(r,p) \in (R,P)} \gamma_{Crp} \cdot \gamma_{Crp}^k \leq \sum_{(r,p) \in (R,P)} \gamma_{Crp}^k - 1, \quad \forall k = 1, 2, \dots, K-1$ | (S7) |
|-----------------------------------------------------------------------------------------------------------------------------------------------|------|

Here  $K-1$  is the total number of previous solutions and  $\gamma_{Crp}^k$  are the corresponding solutions for  $\gamma_{Crp}$  at each previous solution,  $k$ .

#### 2.2 PathTracer Integer Cuts:

Two types of integer cuts can be used to find different types of alternate PathTracer solutions.

**2.2.1 Find Another Path Missing at Least One Edge from Each Prior Path:** The first type of cuts guarantee that any new path proposed does not use at least one edge from a prior path and is formulated as:

|                                                                                                                                                                                                                                        |      |
|----------------------------------------------------------------------------------------------------------------------------------------------------------------------------------------------------------------------------------------|------|
| $\sum_{(i,j,n) \in E_{Map_{nji}}} \sum_{d=1}^{ D } a_{njid} \cdot StoreRxn_j^k + \sum_{(i,j,n) \in E_{Map_{ijn}}} \sum_{d=1}^{ D } a_{njid}^{rev} \cdot StoreRxn_j^k \leq \sum_j StoreRxn_j^k - 1, \quad \forall k = 1, 2, \dots, K-1$ | (S8) |
|----------------------------------------------------------------------------------------------------------------------------------------------------------------------------------------------------------------------------------------|------|

Here  $StoreRxn_j^k$  is a binary parameter that is set to 1 if a reaction,  $j$ , was part of a path in the prior solution  $k$ . In this case, a new integer cut (**Eq. S8**) is added each time a new path is discovered.

**2.2.2 Find Another Path that Uses a Previously Unused Reaction:** The second type of cut requires that a new path use at least one edge that was not used in any previous paths. Only one integer cut constraint is needed (**Eq. S9**).

|                                                                                                                                                                                                                    |      |
|--------------------------------------------------------------------------------------------------------------------------------------------------------------------------------------------------------------------|------|
| $\sum_{(i,j,n) \in \text{Map}_{nji}} \sum_{d=1}^{ D } a_{njid} \cdot (1 - \text{StorePath}_{nji}) + \sum_{(i,j,n) \in \text{Map}_{ijn}} \sum_{d=1}^{ D } a_{njid}^{rev} \cdot (1 - \text{StorePath}_{nji}) \geq 1$ | (S9) |
|--------------------------------------------------------------------------------------------------------------------------------------------------------------------------------------------------------------------|------|

Here  $\text{StorePath}_{nji}$  is a binary parameter that is set to one if any prior path uses reaction,  $j$ , to connect metabolite,  $n$ , to metabolite,  $i$ . This approach does not increase the number of integer cuts as additional solutions are generated; instead, the set of  $\text{StorePath}_{nji}$  parameters change with each new solution. This approach will not propose every solution, since using a reaction that is functionally equivalent to a reaction used in previous paths (e.g. different transport mechanism or different electron carrier) will only count as a new path the first time it is used.

### 3. Bilevel Program to Eliminate All Paths Between Two Metabolites

In the main text, PathTracer enumerated all paths between two metabolites—putrescine and glutamate. These paths were subsequently evaluated to identify reaction deletions that eliminate these paths (in this case, creating essentiality conditions). A more direct approach for finding reaction deletions that eliminate all paths between two metabolites uses bilevel optimization, which includes an inner problem and an outer problem. The inner problem determines whether, when subjected to a set of deletions (provided by the outer problem), there remains a path between the starting and ending metabolite. The presence or absence of a path is then used by the outer problem to find a set of deletions that eliminate all paths.

#### 3.1 Inner Problem:

The inner problem uses the following objective function (**Eq. 10**) and constraints (**Eq. S11-S15**):

|                                                  |       |
|--------------------------------------------------|-------|
| $\max \sum_{n \in \text{EndNode}} \text{Sink}_n$ | (S10) |
|--------------------------------------------------|-------|

The inner problem is similar to PathTracer, except that depth information is omitted and all flow variables ( $\text{Sink}$ ,  $\text{Source}$ ,  $a$  and  $a^{rev}$ ) are non-negative variables rather than binary variables. These changes allow the inner optimization problem to be converted into a set of linear constraints using primal-dual equality. **Eq. S10** maximizes flow through the sink variable ( $\text{Sink}_q$ ) by finding a path from the start to the end node(s). The paths available are constrained by the set of maps (e.g., CTMs) and flow balances over each node (**Eq. S11-S13**):

|                                                                                                                                                                               |       |
|-------------------------------------------------------------------------------------------------------------------------------------------------------------------------------|-------|
| $\sum_{(i,j) \in \text{Map}_{ijn}} (a_{ijn} - a_{nji}^{rev}) + \sum_{(i,j) \in \text{Map}_{nji}} (a_{ijn}^{rev} - a_{nji}) + \text{Source}_n = 0, \quad n = \text{StartNode}$ | (S11) |
|-------------------------------------------------------------------------------------------------------------------------------------------------------------------------------|-------|

|                                                                                                                                                                           |       |
|---------------------------------------------------------------------------------------------------------------------------------------------------------------------------|-------|
| $\sum_{(i,j) \in \text{Map}_{ijn}} (a_{ijn} - a_{nji}^{rev}) + \sum_{(i,j) \in \text{Map}_{nji}} (a_{ijn}^{rev} - a_{nji}) - \text{Sink}_n = 0, \quad n = \text{EndNode}$ | (S12) |
|---------------------------------------------------------------------------------------------------------------------------------------------------------------------------|-------|

|                                                                                                                                                                                                    |       |
|----------------------------------------------------------------------------------------------------------------------------------------------------------------------------------------------------|-------|
| $\sum_{(i,j) \in \text{Map}_{ijn}} (a_{ijn} - a_{nji}^{rev}) + \sum_{(i,j) \in \text{Map}_{nji}} (a_{ijn}^{rev} - a_{nji}) = 0, \quad \forall n   n \notin (\text{StartNode} \cup \text{EndNode})$ | (S13) |
|----------------------------------------------------------------------------------------------------------------------------------------------------------------------------------------------------|-------|

The node balance is similar to the PathTracer's except that depth information is removed. (Note for loops an additional constraint is needed that requires the sum of  $a$  and  $a^{rev}$  over the set  $\text{Map}$  to be greater or equal to the sum of all source flows. Such a constraint prevents a source edge from feeding directly to the sink on the same node, but also allows for the inner problem to still determine whether a path exists.). To capture outer problem deletions in the inner problem, the following constraint is used:

|                                                                                                                                   |       |
|-----------------------------------------------------------------------------------------------------------------------------------|-------|
| $\sum_{(n,i) \in \text{Map}_{nji}} a_{nji} + \sum_{(n,i) \in \text{Map}_{ijn}} a_{nji}^{rev} \leq \beta_j, \quad \forall j \in J$ | (S14) |
|-----------------------------------------------------------------------------------------------------------------------------------|-------|

This is the same reaction removal constraint used in PathTracer except the binary variable,  $\beta_j$ , is used to allow the outer problem to select reaction deletions. To eliminate particular nodes (e.g., CoA and ACP) from being used in a path (**Eq. S15**) can be used.

|                                                                                                                                                    |       |
|----------------------------------------------------------------------------------------------------------------------------------------------------|-------|
| $\sum_{(i,j) \in \text{Map}_{nji}} a_{nji} + \sum_{(i,j) \in \text{Map}_{ijn}} a_{nji}^{rev} \leq 0, \quad \forall n   n = \text{Eliminated Node}$ | (S15) |
|----------------------------------------------------------------------------------------------------------------------------------------------------|-------|

The inner optimization problem is replaced by a set of linear constraints formulated from the primal (**Eq. S10-S15**) and the corresponding dual (not shown) problems.

### 3.2 Outer Problem to Eliminate All Paths:

The inner problem tries to find a path subject to the reaction deletions chosen by the outer problem. To find a minimal set of reaction deletions that eliminates all paths between two metabolites then outer problem would decide values for the non-negative variables,  $\beta_j$  by minimizing the following outer objective function (**Eq. S16**):

|                                                                                             |       |
|---------------------------------------------------------------------------------------------|-------|
| $\min \sum_{n \in \text{EndNode}} \text{Sink}_n + 0.001 \cdot \sum_{j \in J} (1 - \beta_j)$ | (S16) |
|---------------------------------------------------------------------------------------------|-------|

### 3.3 Outer Problem to Eliminate All Paths Except Those Using a Particular Reaction:

The FOCAL algorithm identifies essentiality conditions for a given reaction of interest (*RoI*), where the conditions involve media and gene deletions so that growth can occur if the *RoI* takes place and growth can not occur if the *RoI* does not take place. A similar problem can be formulated as a bilevel pathfinding problem, where paths between a carbon source and a biomass component are all eliminated except paths involving the *RoI*. In this case, the outer problem chooses a set of reactions such that no path exists in the inner problem when the reaction of interest (*RoI*) and the set of reactions are removed, but when *RoI* remains in the network a path still exists. The outer problem is formulated using **Equations S17-S30**:

|                                                                                                                                                                               |       |
|-------------------------------------------------------------------------------------------------------------------------------------------------------------------------------|-------|
| $\sum_{(i,j) \in \text{Map}_{ijn}} (A_{ijn} - A_{nji}^{rev}) + \sum_{(i,j) \in \text{Map}_{nji}} (A_{ijn}^{rev} - A_{nji}) + \text{SOURCE}_n = 0, \quad n = \text{StartNode}$ | (S17) |
|-------------------------------------------------------------------------------------------------------------------------------------------------------------------------------|-------|

|                                                                                                                                                                           |       |
|---------------------------------------------------------------------------------------------------------------------------------------------------------------------------|-------|
| $\sum_{(i,j) \in \text{Map}_{ijn}} (A_{ijn} - A_{nji}^{rev}) + \sum_{(i,j) \in \text{Map}_{nji}} (A_{ijn}^{rev} - A_{nji}) - \text{SINK}_n = 0, \quad n = \text{EndNode}$ | (S18) |
|---------------------------------------------------------------------------------------------------------------------------------------------------------------------------|-------|

|                                                                                                                                                                                                    |       |
|----------------------------------------------------------------------------------------------------------------------------------------------------------------------------------------------------|-------|
| $\sum_{(i,j) \in \text{Map}_{ijn}} (A_{ijn} - A_{nji}^{rev}) + \sum_{(i,j) \in \text{Map}_{nji}} (A_{ijn}^{rev} - A_{nji}) = 0, \quad \forall n   n \notin (\text{StartNode} \cup \text{EndNode})$ | (S19) |
|----------------------------------------------------------------------------------------------------------------------------------------------------------------------------------------------------|-------|

|                                                                                                                                      |       |
|--------------------------------------------------------------------------------------------------------------------------------------|-------|
| $\sum_{(n,i) \in \text{Map}_{nji}} A_{nji} + \sum_{(n,i) \in \text{Map}_{ijn}} A_{nji}^{rev} \leq 1, \quad \forall j \in \text{RoI}$ | (S20) |
|--------------------------------------------------------------------------------------------------------------------------------------|-------|

|                                                                                                                                                         |       |
|---------------------------------------------------------------------------------------------------------------------------------------------------------|-------|
| $\sum_{(n,i) \in \text{Map}_{nji}} A_{nji} + \sum_{(n,i) \in \text{Map}_{ijn}} A_{nji}^{rev} \leq \beta_j, \quad \forall j \in J   j \notin \text{RoI}$ | (S21) |
|---------------------------------------------------------------------------------------------------------------------------------------------------------|-------|

|                                                                                                                                                    |       |
|----------------------------------------------------------------------------------------------------------------------------------------------------|-------|
| $\sum_{(i,j) \in \text{Map}_{nji}} A_{nji} + \sum_{(i,j) \in \text{Map}_{ijn}} A_{nji}^{rev} \leq 0, \quad \forall n   n = \text{Eliminated Node}$ | (S22) |
|----------------------------------------------------------------------------------------------------------------------------------------------------|-------|

**Equations S17-S22** are identical to **S11-S15** with the following exceptions. First, the outer problem uses a different set of variables (*SINK*, *SOURCE*, *A* and  $A^{rev}$ ) than those used in the inner problem (*Sink*, *Source*, *a* and  $a^{rev}$ ). To emphasize this, all non-negative variables in the outer problem are capitalized. The *RoI* can not be deleted in the outer problem (**Eq. S20**), but is deleted in the inner problem using **Eq. S23**, along with other reactions the outer problem chooses to delete (by setting  $\beta_j = 0$  in **Eq. 21**)

|                                               |       |
|-----------------------------------------------|-------|
| $\beta_j = 0, \quad \forall j \in \text{RoI}$ | (S23) |
|-----------------------------------------------|-------|

To ensure growth is still possible when the *RoI* is present, the following COBRA constraints (**Eq. S24-S29**) are included the outer problem:

|                                                              |       |
|--------------------------------------------------------------|-------|
| $\sum_{j \in J} S_{ij} \cdot v_j = 0, \quad \forall i \in I$ | (S24) |
|--------------------------------------------------------------|-------|

|                                                                                  |       |
|----------------------------------------------------------------------------------|-------|
| $v_j \leq v_j^{Upper} \cdot \beta_j \quad \forall j \in J   j \notin \text{RoI}$ | (S25) |
|----------------------------------------------------------------------------------|-------|

|                                                                                  |       |
|----------------------------------------------------------------------------------|-------|
| $v_j \geq v_j^{Lower} \cdot \beta_j \quad \forall j \in J   j \notin \text{RoI}$ | (S26) |
|----------------------------------------------------------------------------------|-------|

|                                                       |       |
|-------------------------------------------------------|-------|
| $v_j \leq v_j^{Upper} \quad \forall j \in \text{RoI}$ | (S27) |
|-------------------------------------------------------|-------|

|                                                       |       |
|-------------------------------------------------------|-------|
| $v_j \geq v_j^{Lower} \quad \forall j \in \text{RoI}$ | (S28) |
|-------------------------------------------------------|-------|

|                                                                    |       |
|--------------------------------------------------------------------|-------|
| $v_{\text{Biomass}} \geq \mu^{min} \quad \forall j \in \text{RoI}$ | (S29) |
|--------------------------------------------------------------------|-------|

where *I* is the set of all metabolites,  $v_{\text{Biomass}}$  is the biomass flux, and  $\mu^{min}$  is the minimum biomass parameter, which was set to 0.1.



|                                                                                                                                                 |       |
|-------------------------------------------------------------------------------------------------------------------------------------------------|-------|
| $\max \sum_{n \in \text{EndNode}} \text{SINK}_n - 10 \cdot \sum_{n \in \text{EndNode}} \text{Sink}_n - 0.01 \cdot \sum_{j \in J} (1 - \beta_j)$ | (S30) |
|-------------------------------------------------------------------------------------------------------------------------------------------------|-------|

The inner (**Eq. S10-S15** with its dual) and outer (**Eq. S17-S29**) problems are combined and **Eq. S30** is used as an objective function to find a minimal set of reaction deletions (where each deletion is penalized by 0.01) such that a path exists in the outer problem where *RoI* is allowed, but no path exists in the inner problem where *RoI* is deleted along with other reactions in the minimal deletion set.

PathTracer sometimes finds incorrect paths (e.g., putrescine to glutamate but all carbon in glutamate comes from 2-oxoglutarate, see **Figure S1**) because individual carbon fates are not tracked (see Discussion). As a result, this bilevel approach might include additional un-necessary reaction deletions to eliminate incorrect paths. To eliminate the un-necessary reaction deletions, an MILP can be used to find the minimal essential set of PathTracer proposed reaction deletions, or the deleted reactions can be checked manually, by testing whether FBA still can not predict growth if the deleted reactions are added back.

#### 4. PathTracer with Net Overall Transformations

PathTracer finds individual linear and cyclic paths; however, the algorithm can be modified to find all necessary paths needed so that the overall balanced reaction of the paths converts a starting metabolite (e.g., CO<sub>2</sub>) into the ending metabolite (e.g., glutamate). Below we describe a formulation to find all paths, including internal loops, in one step. This method was applied to elucidate the CO<sub>2</sub> fixation pathway in iJO1366, which results in the net production of glutamate from CO<sub>2</sub>, using putrescine as an energy and reductant source. The results were manually broken down into smaller sub-paths (**Tables S3-S11**) with their net overall reactions summarized in **Table S12** and **Figure S2**.

The modified algorithm is still a network flow problem. The node balances (**Eq. S31-S33**) are similar to those in the main text, except that *Sink* and *Source* variables are added to all nodes (defined as set *I*) not just the *StartNode* and *EndNode*. This allows recycling of energy metabolites and completing reaction cycles that transfer non-carbon containing functional groups:

|                                                                                                                                                                                                                                                                                                                                                          |       |
|----------------------------------------------------------------------------------------------------------------------------------------------------------------------------------------------------------------------------------------------------------------------------------------------------------------------------------------------------------|-------|
| $\sum_{(i,j) \in \text{Map}_{n,ji}   j \in \text{For}} a_{njid} + \sum_{(i,j) \in \text{Map}_{ijn}   j \in \text{Rev}} a_{njid}^{\text{rev}} = \text{Source}_n, \quad \forall n \in I, d = 1$                                                                                                                                                            | (S31) |
| $\sum_{(i,j) \in \text{Map}_{ijn}   j \in \text{For}} a_{ijnd} + \sum_{(i,j) \in \text{Map}_{n,ji}   j \in \text{Rev}} a_{ijnd}^{\text{rev}} = \sum_{(i,j) \in \text{Map}_{n,ji}   j \in \text{For}} a_{njid+1} + \sum_{(i,j) \in \text{Map}_{ijn}   j \in \text{Rev}} a_{njid+1}^{\text{rev}} \text{Sink}_{nd}, \quad \forall n \in I, d   1 < d <  D $ | (S32) |
| $\sum_{(i,j) \in \text{Map}_{ijn}   j \in \text{For}} a_{ijnd} + \sum_{(i,j) \in \text{Map}_{n,ji}   j \in \text{Rev}} a_{ijnd}^{\text{rev}} = \text{Sink}_{nd}, \quad \forall n \in I, d =  D $                                                                                                                                                         | (S33) |

All sets and variables are defined as before except *Source<sub>n</sub>*, *Sink<sub>nd</sub>*, *a* and *a<sup>rev</sup>* are now integer variables instead of binary variables. To reduce PathTracer's search space pFBA was used (**Eq. S1-S5**) to find reactions that are required to produce glutamate from carbon dioxide. The FBA solution was used to assign reactions to the sets *For* (if *v<sub>j</sub>* > 0) or *Rev* (if *v<sub>j</sub>* < 0) so that only edges associated with the active fluxes can be used. Additional constrains can be used to limit the number of times an edge can be used (**Eq. S34**) or to eliminate edges (**Eq. S35**).

|                                                                                                                                                                                                                                          |       |
|------------------------------------------------------------------------------------------------------------------------------------------------------------------------------------------------------------------------------------------|-------|
| $\sum_{(n,i) \in \text{Map}_{n,ji}   j \in \text{For}} \sum_{d=1}^{ D } a_{njid} + \sum_{(n,i) \in \text{Map}_{ijn}   j \in \text{Rev}} \sum_{d=1}^{ D } a_{njid}^{\text{rev}} \leq L, \quad \forall j \in J$                            | (S34) |
| $\sum_{(n,i) \in \text{Map}_{n,ji}   j \in \text{For}} \sum_{d=1}^{ D } a_{njid} + \sum_{(n,i) \in \text{Map}_{ijn}   j \in \text{Rev}} \sum_{d=1}^{ D } a_{njid}^{\text{rev}} \leq 0, \quad \forall j   j = \text{Eliminated Reaction}$ | (S35) |

Here *L* is the maximum of flow that can pass from node *n* to node *i* using reaction *j*. For the net production of glutamate from CO<sub>2</sub> and putrescine simulations, *L* was set to fifty and the eliminated

reactions included SSALx, SSALy, SPMS, GGPTRCS, CBMkr, HCO3E and POR5 (see main text for details).

The modified PathTracer algorithm finds a minimal set of carbon movements that result in the net production of products (*EndMetabs*) from a defined set of reactants (*StartMetabs*). To enforce an overall net transformation the PathTracer algorithm use the following constraints (**Eq. S36-S39**):

|                                                                                                                                                                                                                                       |       |
|---------------------------------------------------------------------------------------------------------------------------------------------------------------------------------------------------------------------------------------|-------|
| $S_i^{Net} = \sum_{(n,j,i) \in \text{Map}_{n j} j \in \text{For}} \sum_{d=1}^{ D } S_{ij} \cdot a_{njid} + \sum_{(n,j,i) \in \text{Map}_{i j} j \in \text{Rev}} \sum_{d=1}^{ D } -S_{ij} \cdot a_{njid}^{rev}, \quad \forall i \in I$ | (S36) |
| $S_i^{Net} \leq -1, \quad \forall i \in \text{StartMetabs}$                                                                                                                                                                           | (S37) |
| $S_i^{Net} \geq -1, \quad \forall i \in \text{EndMetabs}$                                                                                                                                                                             | (S38) |
| $S_i^{Net} = 0, \quad \forall i \in I   i \notin (\text{StartMetabs} \cup \text{EndMetabs} \cup \text{SmallMetabs})$                                                                                                                  | (S39) |

where  $S_i^{Net}$  is a free variable that represents the stoichiometric coefficient of each metabolite,  $i$ , in the net reaction and is calculated using **Eq. S36**. The remaining constraints (**Eq. S37-S39**) ensure that the net reaction consumes *StartMetabs* and produces *EndMetabs* without producing or consuming any other metabolites, except those included in *SmallMetabs*. *StartMetabs* contains all carbon containing starting metabolites, *EndMetabs* contains all carbon containing end-products, and *SmallMetabs* contains all non-carbon metabolites that can balance the net reaction. All three sets can be defined using FBA simulation results. For the CO<sub>2</sub> to glutamate case, *StartMetabs* contained extracellular putrescine and extracellular CO<sub>2</sub>, *EndMetabs* contained extracellular 4-amino-butanoate and cytoplasmic glutamate, and *SmallMetabs* included extracellular, cytoplasmic, and periplasmic forms of NH<sub>4</sub>, H<sub>2</sub>O, H, and O<sub>2</sub>, as well as cytoplasmic forms of PO<sub>4</sub>, and diphosphate.

To find solutions using sinks and sources associated with just the starting and ending metabolites, penalties were applied to sources and sinks for other metabolites. In this case, penalties punish using a new sink or source but not the amount of flow going through a given source or sink (since this tended to produce long cyclic paths). Penalties were enforced using constraints (**Eq. S40-S41**), where *SourcePenalty* and *SinkPenalty* are binary variables indicating if a source or sink is being used.

|                                                                                                |       |
|------------------------------------------------------------------------------------------------|-------|
| $Source_n \leq 100 \cdot SourcePenalty_n, \quad \forall n \in I   n \notin \text{StartMetabs}$ | (S40) |
| $Sink_{nd} \leq 100 \cdot SinkPenalty_{nd}, \quad \forall (n,d) \in (I,D)$                     | (S41) |

Using constraints **S31-S41**, PathTracer finds the shortest set of carbon transfer paths which generate an appropriate  $S^{Net}$  with the fewest source and sink penalties by minimizing the following objective:

|                                                                                                                           |       |
|---------------------------------------------------------------------------------------------------------------------------|-------|
| $\max \sum_{n \in I} \sum_{d=1}^{ D } d \cdot \theta_n \cdot SinkPenalty_{nd} - 100 \cdot \sum_{n \in I} SourcePenalty_n$ | (S42) |
|---------------------------------------------------------------------------------------------------------------------------|-------|

Here  $\theta_n$  is the penalty for using a particular sink, where  $\theta_n = -0.01$  if  $n \in \text{EndMetabs}$  and  $\theta_n = -1$  if  $n \notin \text{EndMetabs}$ . The MILP was formulated using the general algebraic modeling system (GAMS) and solved using CPLEX 12. The algorithm was allowed to run for twenty minutes or until optimality, whichever came first. For this problem, feasibility is more important than optimality as any solution meets the basic criteria of converting CO<sub>2</sub> to glutamate. In this instance, optimality just improves the quality of the path output. One solution that was found is shown in **Figure S2** and summarized in **Tables S3-S12**.

## Supplementary Figures

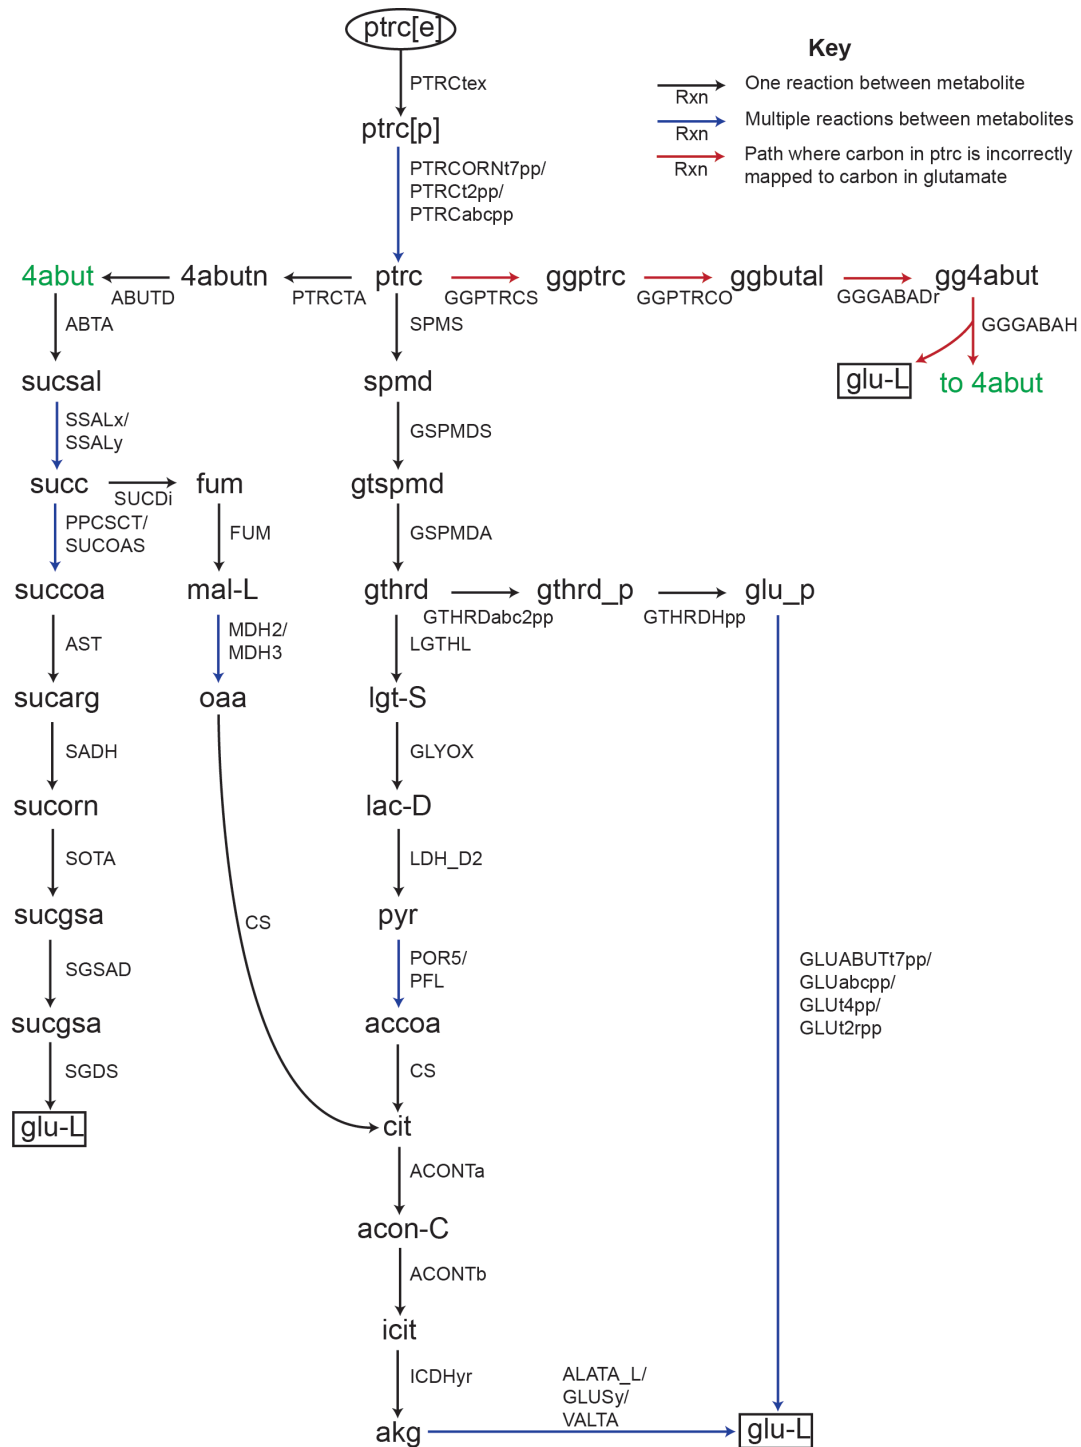

**Figure S1. Top 15 Shortest Paths from Putrescine to Glutamate.**

PathTracer was used to find paths from putrescine (ptrc) to L-glutamate (glu-L). The top fifteen shortest are shown above. Blue lines indicate that multiple reactions can connect a pair of metabolites. Circled and squared metabolites indicate the starting and ending nodes for PathTracer, respectively. 4abut is highlighted in green to indicate it is shown twice. Metabolite abbreviations match those from iJO1366.

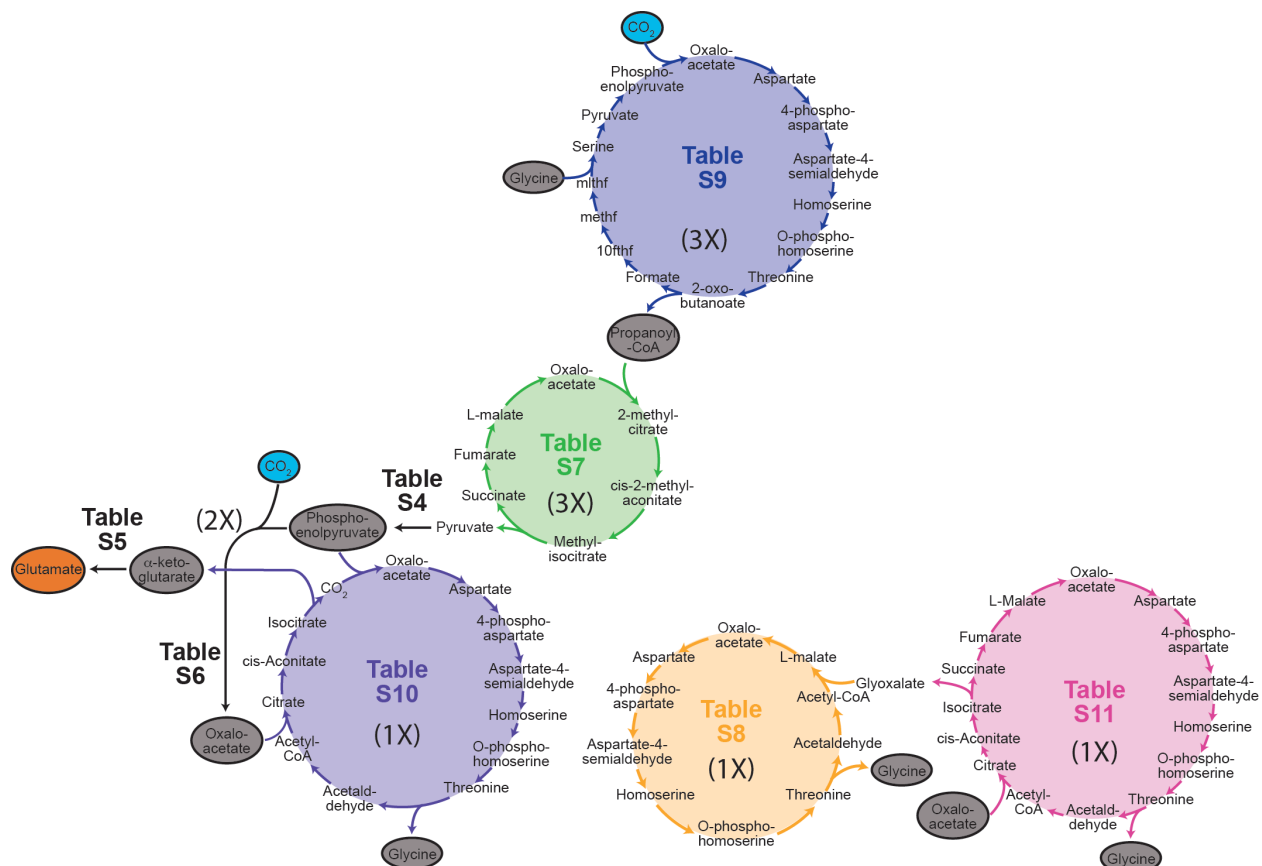

**Figure S2. Carbon Sub-Paths Involved in the Net Transformation of CO<sub>2</sub> to Glutamate.**

PathTracer was used to find paths involved in the overall net transformation of CO<sub>2</sub> to glutamate, using putrescine as electron and energy source. The identified path was broken down into different sub-paths that are summarized in **Tables S3-S11**. All sub-paths are shown except for the respiratory sub-path (**Table S3**) that recycles electron carriers generating a proton gradient. For simplicity not all reactants and products are shown, but the overall reaction for each sub-path can be found in **Table S12**. The cycle involved in **Table S9** is the same as that used in the CO<sub>2</sub> to acetyl-CoA path (labeled as OAA Cycle 1 in **Figure 5**).

## Supplementary Tables

\*All metabolite and reaction abbreviations used in supplementary tables (S2-S12) match those used in iJO1366.

**Table S1. iJO1366 Carbon Transfer Map Category and MapMaker Performance Statistics.**

| Reaction Type                                       | No. (%) of Reactions | No. (%) of Incorrect Carbon Maps |
|-----------------------------------------------------|----------------------|----------------------------------|
| Isomerization/Transport/Non-Carbon Modifications    |                      |                                  |
| w/o Energy Carriers                                 | 921 (40.9%)          | 0 (0%)                           |
| w/ Energy Carriers                                  | 467 (20.7%)          | 0 (0%)                           |
| Combination                                         |                      |                                  |
| w/o Energy Carriers                                 | 70 (3.1%)            | 0 (0%)                           |
| w/ Energy Carriers                                  | 67 (3.0%)            | 0 (0%)                           |
| Decomposition / (A+A)                               |                      |                                  |
| w/o Energy Carriers                                 | 337 (15.0%)          | 0 (0%)                           |
| w/ Energy Carriers                                  | 12 (0.5%)            | 0 (0%)                           |
| Facilitated Decomposition                           |                      |                                  |
| w/o Energy Carriers                                 | 4 (0.2%)             | 0 (0%)                           |
| w/ Energy Carriers                                  | 1 (0.04%)            | 0 (0%)                           |
| Substitution (Non-Carbon Containing)/Cotransporters |                      |                                  |
| w/o Energy Carriers                                 | 88 (3.9%)            | 12 (14%)                         |
| w/ Energy Carriers                                  | 6 (0.3%)             | 0 (0%)                           |
| Substitution (Carbon Containing)                    |                      |                                  |
| w/o Energy Carriers                                 | 161 (7.1%)           | 43 (27%)                         |
| w/ Energy Carriers                                  | 3 (0.1%)             | 0 (0%)                           |
| Higher Complexity                                   | 21 (0.9%)            | 11 (52%)                         |
| Inorganic Reactions                                 | 93 (4.1%)            | 0 (0%)                           |
| <b>Total</b>                                        | <b>2251 (100%)</b>   | <b>66 (2.9%)</b>                 |

**Table S2. iJO1366 Reactions with Incorrectly Predicted Carbon Transfer Maps**

|          |                                                                                  |
|----------|----------------------------------------------------------------------------------|
| 3OAS100  | $h[c] + malACP[c] + ocACP[c] \rightarrow 3odecACP[c] + ACP[c] + co2[c]$          |
| 3OAS120  | $dcaACP[c] + h[c] + malACP[c] \rightarrow 3oddecACP[c] + ACP[c] + co2[c]$        |
| 3OAS121  | $cddec3eACP[c] + h[c] + malACP[c] \rightarrow 3ocddec5eACP[c] + ACP[c] + co2[c]$ |
| 3OAS140  | $ddcaACP[c] + h[c] + malACP[c] \rightarrow 3omrsACP[c] + ACP[c] + co2[c]$        |
| 3OAS141  | $cddec5eACP[c] + h[c] + malACP[c] \rightarrow 3ocmrs7eACP[c] + ACP[c] + co2[c]$  |
| 3OAS181  | $h[c] + hdeACP[c] + malACP[c] \rightarrow 3ocvac11eACP[c] + ACP[c] + co2[c]$     |
| 3OAS60   | $butACP[c] + h[c] + malACP[c] \rightarrow 3ohexACP[c] + ACP[c] + co2[c]$         |
| 3OAS80   | $h[c] + hexACP[c] + malACP[c] \rightarrow 3ooctACP[c] + ACP[c] + co2[c]$         |
| ACACCT   | $acac[c] + accoa[c] \rightarrow aacoa[c] + ac[c]$                                |
| ACACT2r  | $accoa[c] + btcoa[c] \rightleftharpoons 3ohcoa[c] + coa[c]$                      |
| ACACT3r  | $accoa[c] + hxcoa[c] \rightleftharpoons 3oocoa[c] + coa[c]$                      |
| ACACT4r  | $accoa[c] + occoa[c] \rightleftharpoons 3odcoa[c] + coa[c]$                      |
| ACACT5r  | $accoa[c] + dcacoa[c] \rightleftharpoons 3oddcOA[c] + coa[c]$                    |
| ACACT6r  | $accoa[c] + ddcacoa[c] \rightleftharpoons 3otdcoa[c] + coa[c]$                   |
| ACACT7r  | $accoa[c] + tdcoa[c] \rightleftharpoons 3ohdcoa[c] + coa[c]$                     |
| ADNK1    | $adn[c] + atp[c] \rightarrow adp[c] + amp[c] + h[c]$                             |
| ADOCBLS  | $agdpcbi[c] + rdmbzi[c] \rightarrow adocbl[c] + gmp[c] + h[c]$                   |
| ADSK     | $aps[c] + atp[c] \rightarrow adp[c] + h[c] + paps[c]$                            |
| BMOCOS   | $moco[c] + mptamp[c] \rightarrow amp[c] + bmoco[c] + cu2[c]$                     |
| BUTCT    | $accoa[c] + but[c] \rightarrow ac[c] + btcoa[c]$                                 |
| BWCOS    | $mptamp[c] + wco[c] \rightarrow amp[c] + bwco[c] + cu2[c]$                       |
| CRNBCT   | $bbtcoa[c] + crn[c] \rightleftharpoons crncoa[c] + gbbtn[c]$                     |
| CRNCBCT  | $crn[c] + ctbtcoa[c] \rightleftharpoons crncoa[c] + ctbt[c]$                     |
| CRNt8pp  | $crn-D[c] + crn[p] \rightarrow crn[c] + crn-D[p]$                                |
| DGK1     | $atp[c] + dgmp[c] \rightleftharpoons adp[c] + dgdp[c]$                           |
| DHAPT    | $dha[c] + pep[c] \rightarrow dhap[c] + pyr[c]$                                   |
| DXPS     | $g3p[c] + h[c] + pyr[c] \rightarrow co2[c] + dxy15p[c]$                          |
| ECAP2pp  | $eca2und[p] + unagamuf[p] \rightarrow eca3und[p] + h[p] + udcpp[p]$              |
| ECAP3pp  | $eca3und[p] + unagamuf[p] \rightarrow eca4und[p] + h[p] + udcpp[p]$              |
| ENTCS    | $3\ 23dhba[c] + 3\ seramp[c] \rightarrow 6\ amp[c] + enter[c] + 9\ h[c]$         |
| FORCT    | $forcoa[c] + oxa[c] \rightleftharpoons for[c] + oxalcoa[c]$                      |
| GDPDPK   | $atp[c] + gdp[c] \rightarrow amp[c] + h[c] + pppp[c]$                            |
| GK1      | $atp[c] + gmp[c] \rightleftharpoons adp[c] + gdp[c]$                             |
| HXCT     | $accoa[c] + hxa[c] \rightarrow ac[c] + hxcoa[c]$                                 |
| MPTG2    | $uaagmda[c] + murein5p5p[p] \rightarrow h[c] + udcpp[p] + murein5p5p5p[p]$       |
| NDPK1    | $atp[c] + gdp[c] \rightleftharpoons adp[c] + gtp[c]$                             |
| NDPK5    | $atp[c] + dgdp[c] \rightleftharpoons adp[c] + dgtp[c]$                           |
| NDPK8    | $atp[c] + dadp[c] \rightleftharpoons adp[c] + datp[c]$                           |
| NNDMBRT  | $dmbzid[c] + nicrnt[c] \rightarrow 5prdmbz[c] + h[c] + nac[c]$                   |
| O16AP2pp | $o16a2und[p] + o16aund[p] \rightarrow h[p] + o16a3und[p] + udcpp[p]$             |
| O16AP3pp | $o16a3und[p] + o16aund[p] \rightarrow h[p] + o16a4und[p] + udcpp[p]$             |
| OPMEACPS | $gmeACP[c] + h[c] + malACP[c] \rightarrow ACP[c] + co2[c] + opmeACP[c]$          |
| PAPPT3   | $udcpp[c] + ugmda[c] \rightarrow uagmda[c] + ump[c]$                             |
| PDH      | $coa[c] + nad[c] + pyr[c] \rightarrow accoa[c] + co2[c] + nadh[c]$               |
| PGSA120  | $cdpdddecg[c] + glyc3p[c] \rightarrow cmp[c] + h[c] + pgp120[c]$                 |
| PGSA140  | $cdpdtdecg[c] + glyc3p[c] \rightarrow cmp[c] + h[c] + pgp140[c]$                 |
| PGSA141  | $cdpdtdec7eg[c] + glyc3p[c] \rightarrow cmp[c] + h[c] + pgp141[c]$               |
| PGSA160  | $cdpdhdecg[c] + glyc3p[c] \rightarrow cmp[c] + h[c] + pgp160[c]$                 |
| PGSA161  | $cdpdhdec9eg[c] + glyc3p[c] \rightarrow cmp[c] + h[c] + pgp161[c]$               |
| PGSA180  | $cdpdodecg[c] + glyc3p[c] \rightarrow cmp[c] + h[c] + pgp180[c]$                 |

|           |                                                          |
|-----------|----------------------------------------------------------|
| PGSA181   | cdpdodec11eg[c] + glyc3p[c] -> cmp[c] + h[c] + pgp181[c] |
| PPCSCT    | ppcoa[c] + succ[c] -> ppa[c] + succoa[c]                 |
| PSSA120   | cdpdddecg[c] + ser-L[c] -> cmp[c] + h[c] + ps120[c]      |
| PSSA140   | cdpdtdecg[c] + ser-L[c] -> cmp[c] + h[c] + ps140[c]      |
| PSSA141   | cdpdtdec7eg[c] + ser-L[c] -> cmp[c] + h[c] + ps141[c]    |
| PSSA160   | cdpdhdecg[c] + ser-L[c] -> cmp[c] + h[c] + ps160[c]      |
| PSSA161   | cdpdhdec9eg[c] + ser-L[c] -> cmp[c] + h[c] + ps161[c]    |
| PSSA180   | cdpdodecg[c] + ser-L[c] -> cmp[c] + h[c] + ps180[c]      |
| PSSA181   | cdpdodec11eg[c] + ser-L[c] -> cmp[c] + h[c] + ps181[c]   |
| SEPHCHCS  | akg[c] + h[c] + ichor[c] -> 2sephchc[c] + co2[c]         |
| SHSL1     | cys-L[c] + suchms[c] -> cyst-L[c] + h[c] + succ[c]       |
| SUCFUMtpp | succ[c] + fum[p] <=> fum[c] + succ[p]                    |
| TALA      | g3p[c] + s7p[c] <=> e4p[c] + f6p[c]                      |
| TRE6PS    | g6p[c] + udpg[c] -> h[c] + tre6p[c] + udp[c]             |
| UGLT      | gal1p[c] + udpg[c] <=> g1p[c] + udpgal[c]                |
| VALTA     | akg[c] + val-L[c] <=> 3mob[c] + glu-L[c]                 |

**Table S3. NADH and Ubiquinone Recycling**

| Depth | Path                       | Flow |
|-------|----------------------------|------|
| 1     | q8h2 --> q8 via CYTBO3_4pp | 33   |
| 2     | q8 --> q8h2 via NADH16pp   | 29   |

**Table S4. ATP Generation and Pyruvate to Phosphoenolpyruvate**

| Depth | Path                     | Flow |
|-------|--------------------------|------|
| 1     | adp --> atp via ATPS4rpp | 27   |
| 2     | atp --> adp via ADK1     | 6    |
| 2     | atp --> amp via PPS      | 3    |

**Table S5. Glutamate Generation and Putrescine Degradation**

| Depth | Path                              | Flow |
|-------|-----------------------------------|------|
| 1     | ptrc_e --> ptrc_p via PTRCtex     | 21   |
| 2     | ptrc_p --> ptrc via PTRCt2pp      | 21   |
| 3     | ptrc --> 4abutn via PTRCTA        | 21   |
| 4     | 4abutn --> 4abut via ABUTD        | 21   |
| 5     | 4abut --> 4abut_p via GLUABUTt7pp | 21   |
| 6     | 4abut_p --> 4abut_e via ABUTtex   | 21   |
| 1     | glu-L --> akg via GLUDy           | 14   |
| 1     | glu-L --> glu-L_p via GLUt2rpp    | 21   |

**Table S6. CO<sub>2</sub> and Phosphoenolpyruvate to Oxaloacetate**

| Depth | Path                       | Flow |
|-------|----------------------------|------|
| 1     | co2_e --> co2_p via CO2tex | 5    |
| 2     | co2_p --> co2 via CO2tpp   | 5    |
| 3     | co2 --> oaa via PPC        | 2    |

**Table S7. Propanoyl-CoA to Pyruvate**

| Depth | Path                         | Flow |
|-------|------------------------------|------|
| 4,36  | oaa --> 2mcit via MCITS      | 3    |
| 5,37  | 2mcit --> 2mcacn via MCITD   | 3    |
| 6,38  | 2mcacn --> micit via MICITDr | 3    |
| 7,39  | micit --> succ via MCITL2    | 3    |
| 8,40  | succ --> fum via SUCDi       | 3    |
| 9,41  | fum --> mal-L via FUM        | 3    |
| 10,42 | mal-L --> oaa via MDH        | 3    |

**Table S8. Glyoxylate to Glycine**

| Depth | Path                      | Flow |
|-------|---------------------------|------|
| 11    | oaa --> asp-L via ASPTA   | 1    |
| 12    | asp-L --> 4pasp via ASPK  | 1    |
| 13    | 4pasp --> aspsa via ASAD  | 1    |
| 14    | aspsa --> hom-L via HSDy  | 1    |
| 15    | hom-L --> phom via HSK    | 1    |
| 16    | phom --> thr-L via THRS   | 1    |
| 17    | thr-L --> acald via THRAi | 1    |
| 18    | acald --> accoa via ACALD | 1    |
| 19    | accoa --> mal-L via MALS  | 1    |
| 20    | mal-L --> oaa via MDH     | 1    |



**Table S9. CO<sub>2</sub> and Glycine to Propanoyl-CoA**

| Depth    | Path                          | Flow |
|----------|-------------------------------|------|
| 11,21,41 | oaa --> asp-L via ASPTA       | 3    |
| 12,22,42 | asp-L --> 4pasp via ASPK      | 3    |
| 13,23,43 | 4pasp --> aspsa via ASAD      | 3    |
| 14,24,44 | aspsa --> hom-L via HSDy      | 3    |
| 15,25,45 | hom-L --> phom via HSK        | 3    |
| 16,26,46 | phom --> thr-L via THRS       | 3    |
| 17,27,47 | thr-L --> 2obut via THRD_L    | 3    |
| 18,28,48 | 2obut --> formate via OBTFL   | 3    |
| 19,29,49 | formate --> 10fthf via FTHFLi | 3    |
| 20,30,50 | 10fthf --> methf via MTHFC    | 3    |
| 21,31,51 | methf --> mlthf via MTHFD     | 3    |
| 22,32,52 | mlthf --> ser-L via GHMT2r    | 3    |
| 23,33,53 | ser-L --> pyr via SERD_L      | 3    |
| 24,34,54 | pyr --> pep via PPS           | 3    |
| 25,35,55 | pep --> oaa via PPC           | 3    |

**Table S10. Oxaloacetate and Phosphoenolpyruvate to  $\alpha$ -Ketoglutarate and Glycine**

| Depth | Path                       | Flow |
|-------|----------------------------|------|
| 43    | oaa --> asp-L via ASPTA    | 1    |
| 44    | asp-L --> 4pasp via ASPK   | 1    |
| 45    | 4pasp --> aspsa via ASAD   | 1    |
| 46    | aspsa --> hom-L via HSDy   | 1    |
| 47    | hom-L --> phom via HSK     | 1    |
| 48    | phom --> thr-L via THRS    | 1    |
| 49    | thr-L --> acald via THRAi  | 1    |
| 50    | acald --> accoa via ACALD  | 1    |
| 51    | accoa --> cit via CS       | 1    |
| 52    | cit --> acon-C via ACONTa  | 1    |
| 53    | acon-C --> icit via ACONTb | 1    |
| 54    | icit --> co2 via ICDHyr    | 1    |
| 55    | co2 --> oaa via PPC        | 1    |

**Table S11. Oxaloacetate to Glycine and Glyoxylate**

| Depth | Path                       | Flow |
|-------|----------------------------|------|
| 26    | oaa --> asp-L via ASPTA    | 1    |
| 27    | asp-L --> 4pasp via ASPK   | 1    |
| 28    | 4pasp --> aspsa via ASAD   | 1    |
| 29    | aspsa --> hom-L via HSDy   | 1    |
| 30    | hom-L --> phom via HSK     | 1    |
| 31    | phom --> thr-L via THRS    | 1    |
| 32    | thr-L --> acald via THRAi  | 1    |
| 33    | acald --> accoa via ACALD  | 1    |
| 34    | accoa --> cit via CS       | 1    |
| 35    | cit --> acon-C via ACONTa  | 1    |
| 36    | acon-C --> icit via ACONTb | 1    |
| 37    | icit --> succ via ICL      | 1    |
| 38    | succ --> fum via SUCDi     | 1    |
| 39    | fum --> mal-L via FUM      | 1    |
| 40    | mal-L --> oaa via MDH      | 1    |

**Table S12. Overall Reactions for Each Sub-Path and Net Overall Transformation Reaction**

| Sub-Path Table         | Overall Sub-Path or Net Reactant Stoichiometry            | Overall Sub-Path or Net Product Stoichiometry                         |
|------------------------|-----------------------------------------------------------|-----------------------------------------------------------------------|
| S3                     | 248 h + 29 nadh + 16.5 o2 + 4 q8h2                        | 219 h[p] + 33 h2o + 29 nad + 4 q8                                     |
| S4                     | 15 adp + 3 amp + 108 h[p] + 24 pi + 3 pyr                 | 18 atp + 87 h + 24 h2o + 3 pep                                        |
| S5                     | 7 akg + 35 h2o + 21 nad + 14 nadp + 21 ptrc[e]            | 21 4abut[e] + 7 glu-L + 56 h + 21 nadh + 14 nadph + 14 nh4            |
| S6                     | 5 co2[e] + 2 h2o + 2 pep                                  | 3 co2 + 2 h + 2 oaa + 2 pi                                            |
| S7                     | 6 h2o + 3 nad + 3 ppcoa + 3 q8                            | 3 coa + 6 h + 3 nadh + 3 pyr + 3 q8h2                                 |
| S8                     | 2 atp + 1 glu-L + 1 glx + 2 h2o + 2 nad + 2 nadph         | 2 adp + 1 akg + 1 gly + 2 h + 2 nadh + 2 nadp + 2 pi                  |
| S9                     | 12 atp + 3 co2 + 3 coa + 3 gluL + 3 gly + 9 h2o + 9 nadph | 9 adp + 3 akg + 3 amp + 3 h + 9 nadp + 6 nh4 + 15 pi + 3 ppcoa        |
| S10                    | 2 atp + 1 glu-L + 3 h2o + 1 nad + 1 nadph + 1 oaa + 1 pep | 2 adp + 2 akg + 1 gly + 2 h + 1 nadh + 1 nadp + 3 pi                  |
| S11                    | 2 atp + 1 glu-L + 3 h2o + 2 nad + 2 nadph + 1 oaa + 1 q8  | 2 adp + 1 akg + 1 glx + 1 gly + 2 h + 2 nadh + 2 nadp + 2 pi + 1 q8h2 |
| <b>Net Overall Rxn</b> | 5 co2[e] + 88 h + 3 h2o + 16.5 o2 + 21 ptrc[e]            | 21 4abut[e] + 1 glu-L + 111 h[p] + 20 nh4                             |
